# Supplementary material
Source: MDPI journal article supplement (https://www.mdpi.com/2227-9717/9/3/418)
Supplement: s1 [file s1 › processes-1110501-supplementary.pdf]

Supplementary Materials

# Chemical Profiling of *Pistacia lentiscus* var. *Chia* Resin and Essential Oil: Ageing Markers and Antimicrobial Activity

Vasiliki K. Pachi <sup>1</sup>, Eleni V. Mikropoulou <sup>1</sup>, Sofia Dimou <sup>2</sup>, Mariangela Dionysopoulou <sup>2</sup>, Aikaterini Argyropoulou <sup>3</sup>, George Dhallinas <sup>2,4</sup> and Maria Halabalaki <sup>1,\*</sup>

<sup>1</sup> Division of Pharmacognosy and Natural Products Chemistry, Department of Pharmacy, National and Kapodistrian University of Athens, Panepistimiopolis Zografou 15771 Athens, Greece; vpachi@pharm.uoa.gr (V.K.P.); elenamik@pharm.uoa.gr (E.V.M.)

<sup>2</sup> Department of Biology, National and Kapodistrian University of Athens, Panepistimiopolis Zografou 15784 Athens, Greece; sofiadimou123@gmail.com (S.D.); mariangeladiony@gmail.com (M.D.); dhalina@biol.uoa.gr (G.D.)

<sup>3</sup> PharmaGnose S.A., 57th km Athens—Lamia National Road, 32011 Oinofyta, Greece; kargyropoulou@pharmagnose.com

<sup>4</sup> Institute of Molecular Biology and Biotechnology, Foundation for Research and Technology, GR-70013 Heraklion, Greece

\* Correspondence: mariahal@pharm.uoa.gr; Tel.: +30-2107-2747-81

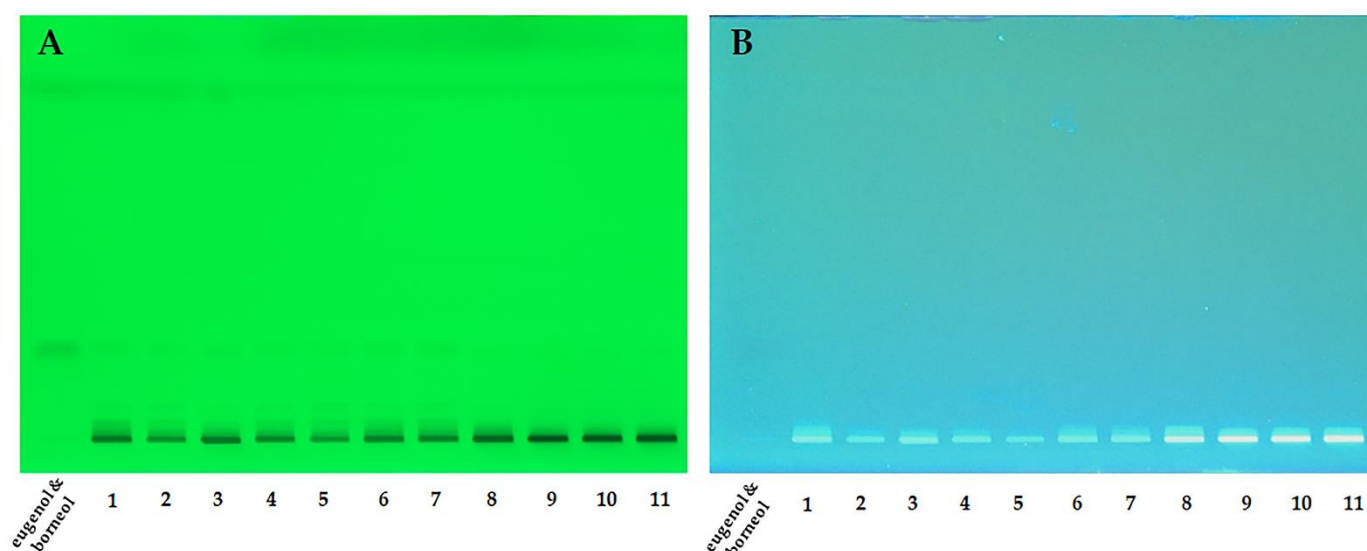

**Figure S1.** HPTLC chromatogram of CMG with the Ph. Eur. Method. Detection at (A) 254 nm and (B) 366 nm.

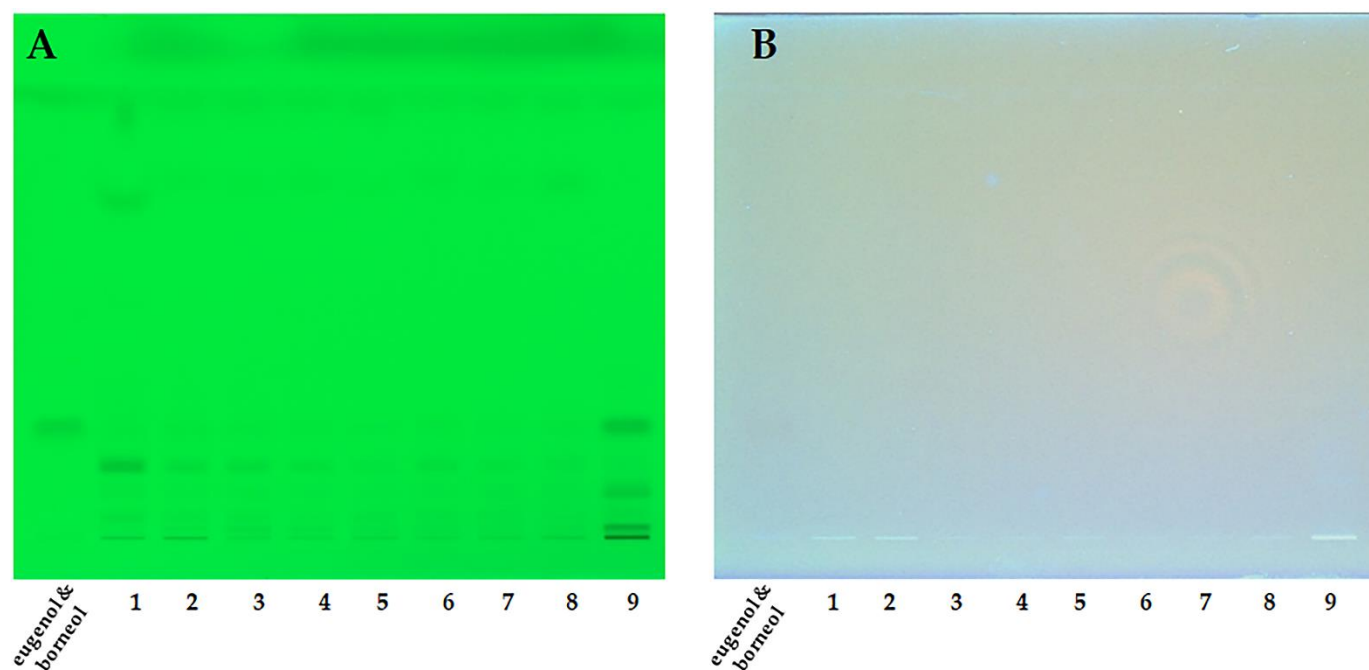

**Figure S2.** HPTLC chromatogram of CMO with the **Ph. Eur. Method**. Detection at (A) 254 nm and (B) 366 nm.

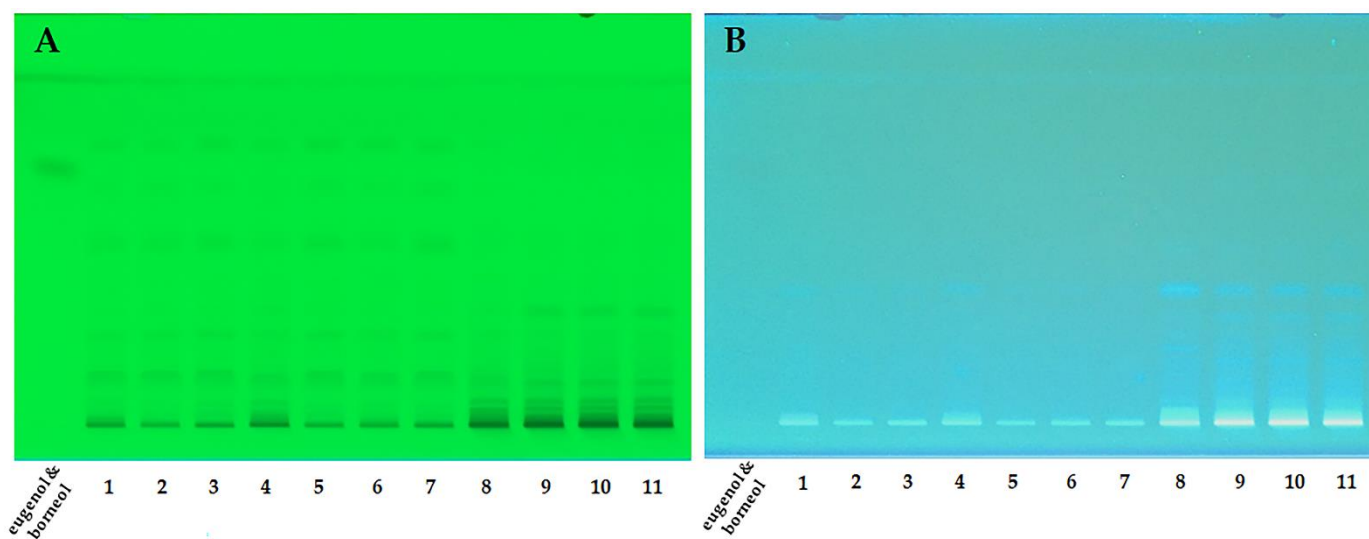

**Figure S3.** HPTLC chromatogram of CMG developed with the **in-house method**. Detection at (A) 254 nm and (B) 366 nm.

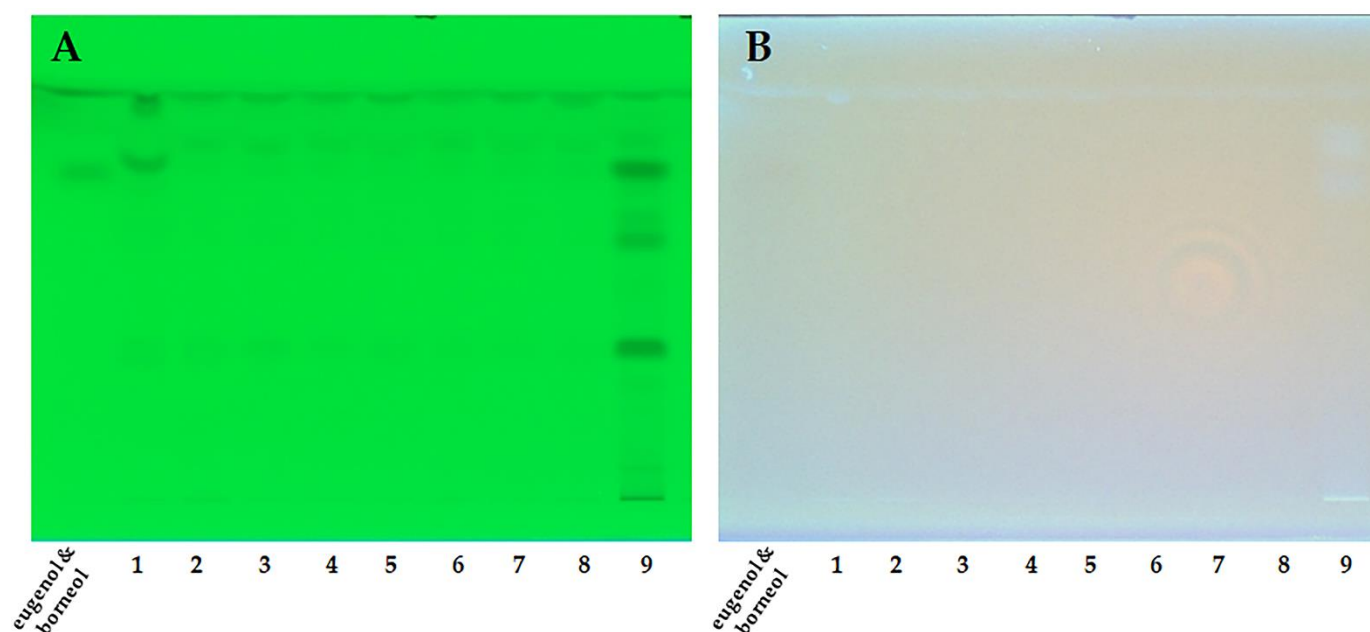

Figure S4. HPTLC chromatogram of CMO developed with the **in-house method**. Detection at (A) 254 nm and (B) 366 nm.

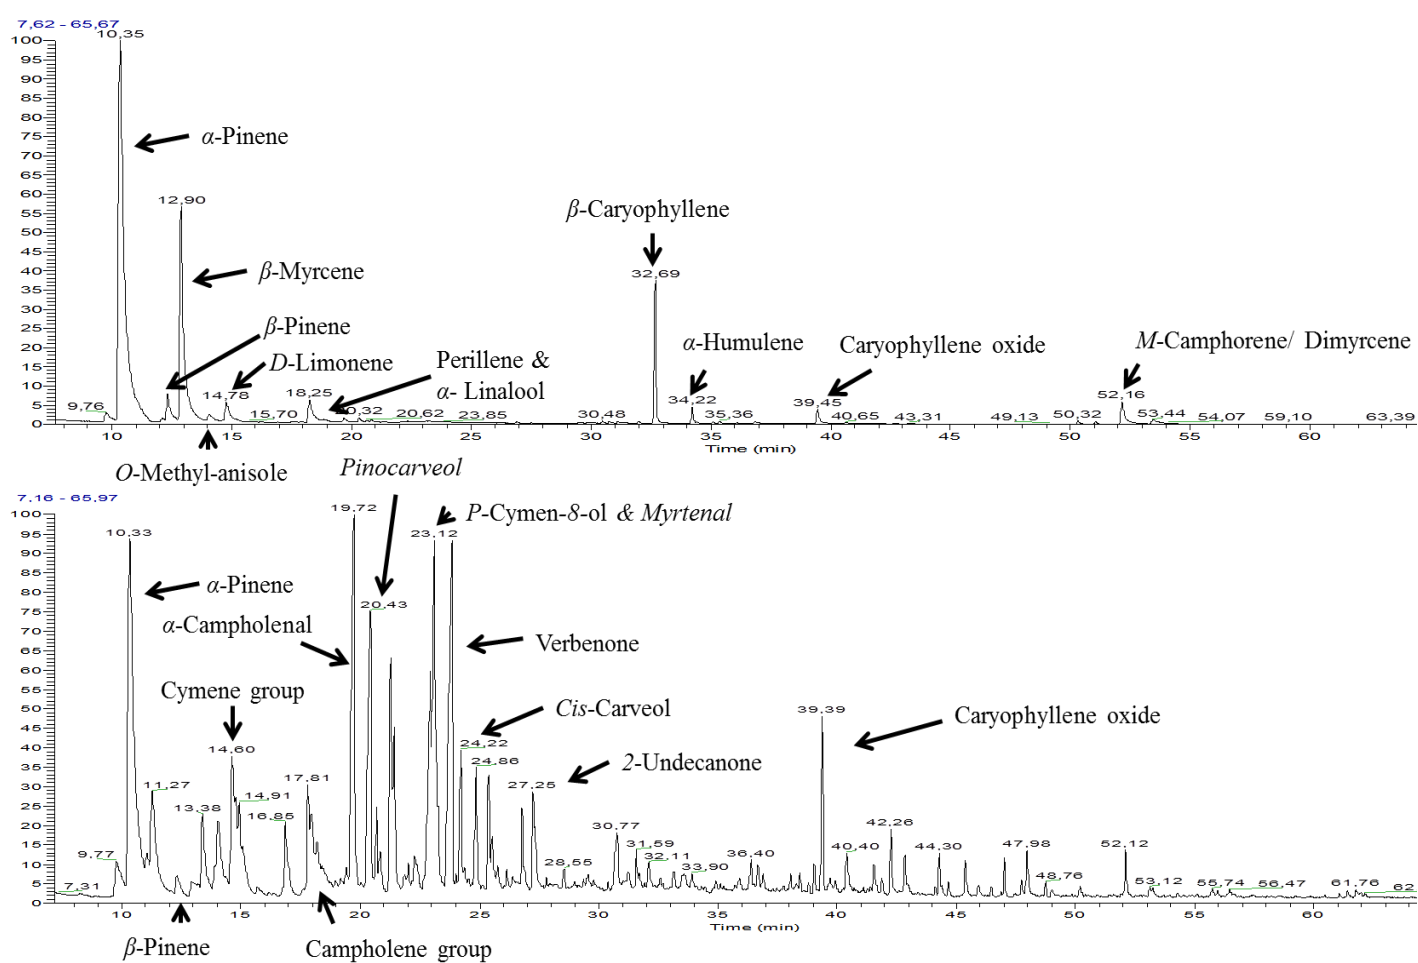

Figure S5. Zoomed superimposed total ion chromatograms (TIC) of a fresh (CMO<sub>1</sub>) and an aged sample (CMO<sub>9</sub>).

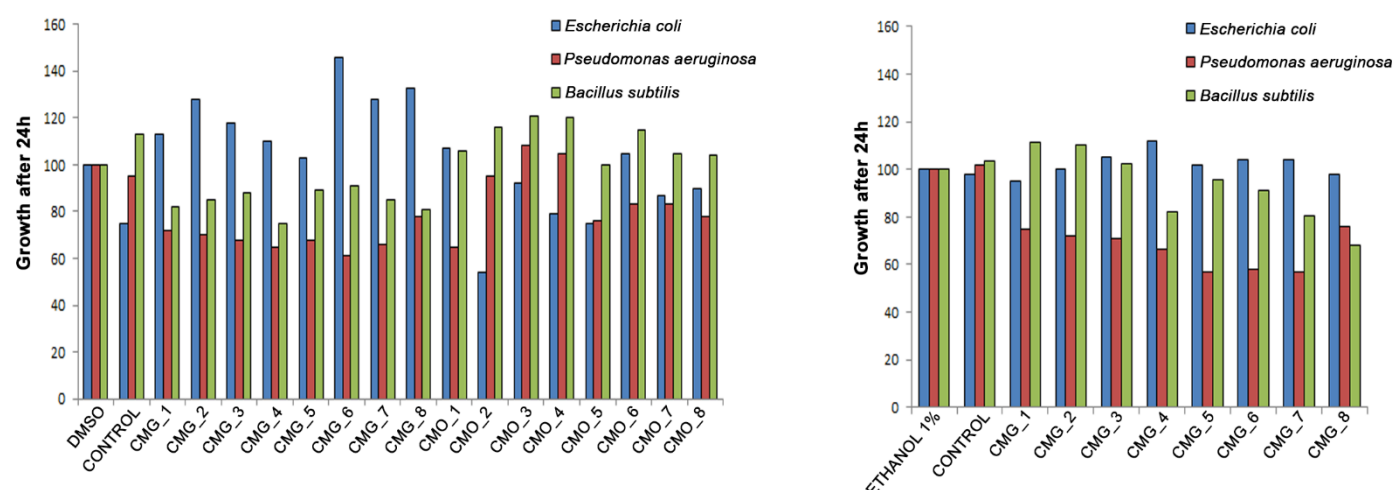

**Figure S6.** Effect of resins and essential oils against bacteria. Comparison of bacterial growth (*E. coli*, *P. aeruginosa* and *B. subtilis*), as expressed by measuring optical density values (550 nm), in the presence of resins (CMG\_1–8) or essential oils (CMO\_1–8), after 24h of incubation at 37 °C. Values in graphs represent % of growth in the presence of mastic extracts relative to control (no mastic extract added) taken as 100%. In the left panel mastic resins and essential oils diluted in DMSO were added at a final concentration of 0.2mg/mL (1% DMSO), whilst in the right panel mastic resins diluted in ethanol were added at final concentration of 0.4 mg/mL (1% ethanol). Standard deviation in all cases was <1%.

**Table S1.** Minimum, maximum, and average values for the ratios of major compounds in CMO samples (CMO\_1–8, CMO\_9).

| Code             | $\beta$ -Myrcene/<br>$\alpha$ -Pinene | $\beta$ -Pinene/<br>$\beta$ -Myrcene |
|------------------|---------------------------------------|--------------------------------------|
| CMO_1            | 0.35                                  | 0.13                                 |
| CMO_2            | 0.20                                  | 0.24                                 |
| CMO_3            | 0.18                                  | 0.19                                 |
| CMO_4            | 0.31                                  | 0.13                                 |
| CMO_5            | 0.22                                  | 0.17                                 |
| CMO_6            | 0.31                                  | 0.15                                 |
| CMO_7            | 0.22                                  | 0.21                                 |
| CMO_8            | 0.14                                  | 0.43                                 |
| Minimum          | 0.14                                  | 0.13                                 |
| Maximum          | 0.35                                  | 0.43                                 |
| Average $\pm$ SD | 0.24 $\pm$ 0.075                      | 0.21 $\pm$ 0.10                      |
| CMO_9 (aged)     | 0                                     | -                                    |
